# Supplementary material for: Growth of Yersinia pseudotuberculosis in human plasma: impacts on virulence and metabolic gene expression
Source: PubMed Central journal article supplement (PMC2631605; doi:10.1186/1471-2180-8-211), 2008-12-03

## Target genes

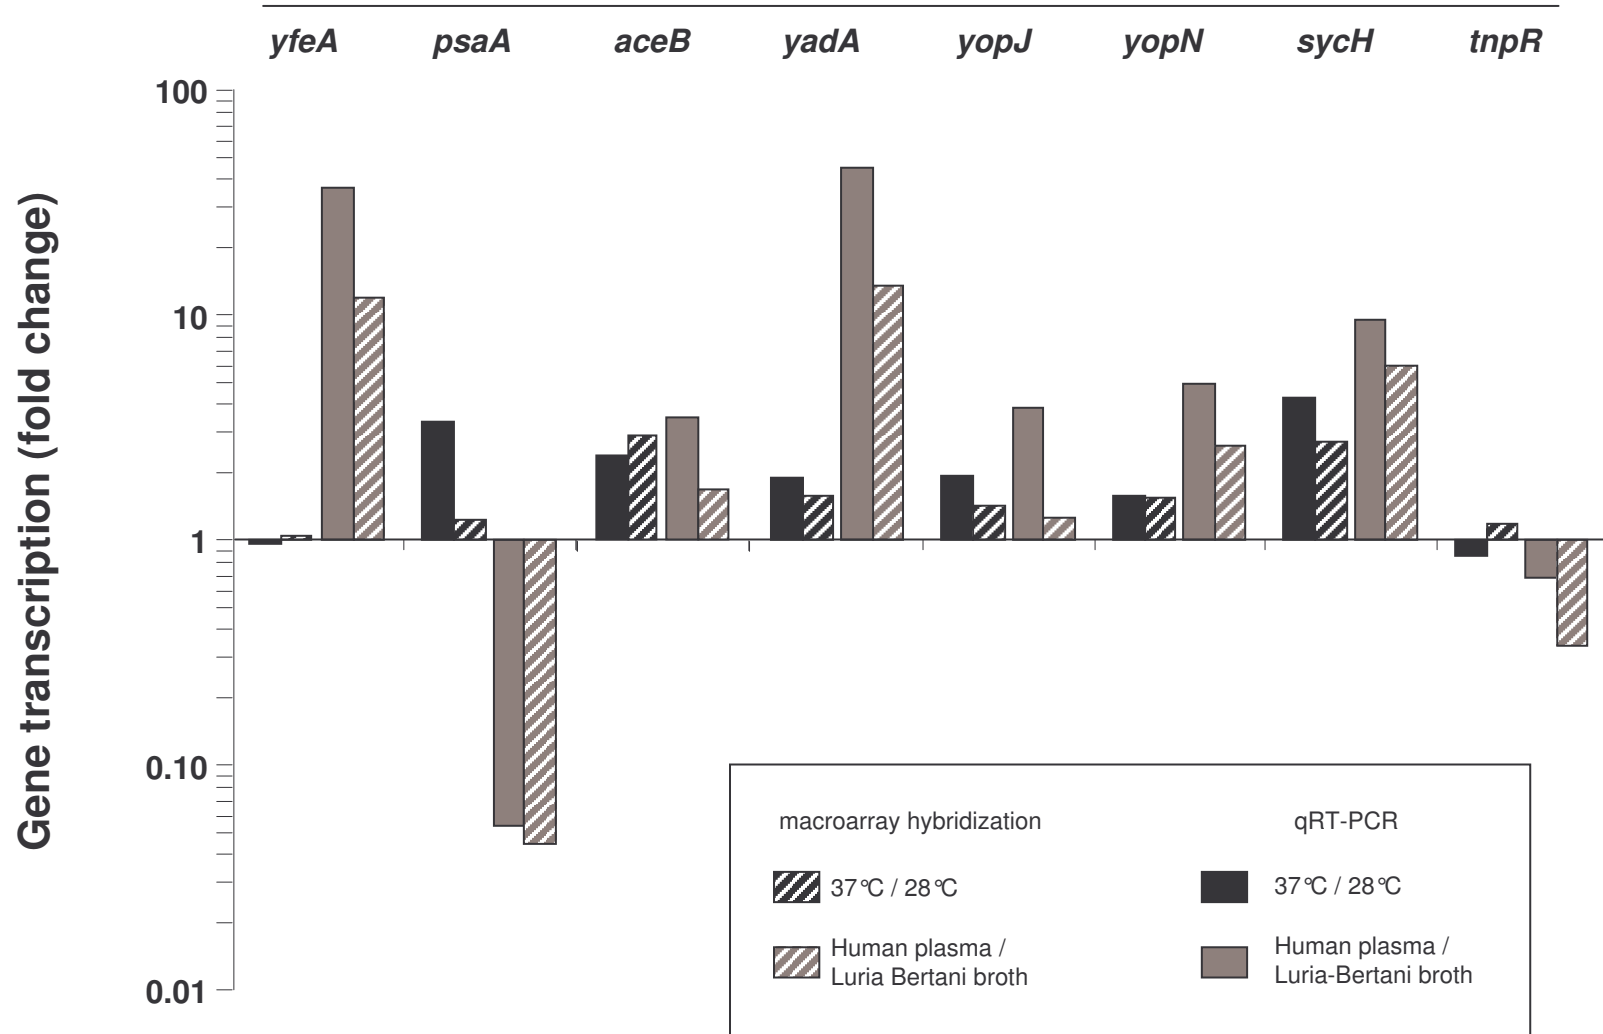

Supplement: 1471-2180-8-211-S1.pdf [file 1471-2180-8-211-S1.pdf]
